# Supplementary material for: Ring-opening of cyclic ethers by aluminum hydridotriphenylborate
Source: Royal Society of Chemistry journal article supplement (doi:10.1039/c7cc01159h), 2017-01-01
Supplement: c7cc01159h1.pdf [file c7cc01159h1.pdf]

## Electronic Supporting Information

### Ring-opening of cyclic ethers by aluminum hydridotriphenylborate

Debabrata Mukhejee, Hassan Osseili, Khai-Nghi Truong,

Thomas P. Spaniol, and Jun Okuda\*

Institute of Inorganic Chemistry, RWTH Aachen University,  
Landoltweg 1, 52056 Aachen, Germany.

#### Table of Contents

|                                                                  |     |
|------------------------------------------------------------------|-----|
| General remarks.....                                             | S1  |
| Synthetic procedures and spectroscopic data for <b>1-4</b> ..... | S1  |
| Deuterium labeling study.....                                    | S11 |
| Hydroboration catalysis.....                                     | S13 |
| X-ray crystallography.....                                       | S13 |
| References.....                                                  | S15 |

#### General remarks

All manipulations were performed under argon atmosphere using standard Schlenk or glove box techniques. Prior to use, the glassware were dried overnight at 130 °C and solvents were dried, distilled and degassed using standard methods. (Me<sub>3</sub>TACD)H (LH) was synthesized following a literature procedure.<sup>S1</sup> AlH<sub>3</sub>(NMe<sub>2</sub>Et) (0.5 M in toluene) and pinacolborane (HBpin) were purchased from Sigma-Aldrich and used as received. BPh<sub>3</sub> (95%) was purchased from abcr and purified by sublimation. Tetrahydropyran (THP) was purchased from Sigma-Aldrich and dried, distilled, and degassed prior storing over molecular sieves inside the glove box. NMR measurements were performed on a Bruker DRX 400 at ambient temperature unless otherwise mentioned. The chemical shifts ( $\delta$  ppm) in the <sup>1</sup>H and <sup>13</sup>C{<sup>1</sup>H} NMR spectra were referenced to the residual proton signals of the deuterated solvents and reported relative to tetramethylsilane.<sup>S2</sup> Abbreviations for NMR spectra: s (singlet), d (doublet), t (triplet), quint (quintet), sept (septet), br (broad). IR spectra were measured as KBr pellets using an AVATAR 360 FT-IR spectrometer. Abbreviations for IR spectra: w (weak), m (medium), s (strong), br. (broad). Elemental analyses were performed on an *elementar vario EL* machine.

#### Synthetic procedures and spectroscopic data for **1-4**

##### [(L)AlH<sub>2</sub>] (**1**) and [(L)AlD<sub>2</sub>] (**1-d<sub>2</sub>**)

A 0.5 M solution of AlH<sub>3</sub>(NMe<sub>2</sub>Et) (2 mL) was added dropwise with a syringe to a solution of LH (0.214 g, 0.998 mmol) in 2 mL of toluene at room temperature. The solution became turbid while mixing and precipitation of a colorless solid was complete within 15 min. The solid was isolated by filtration and washed with *n*-pentane (3×5 mL). Drying the solid under

vacuum afforded analytically pure [(L)AlH<sub>2</sub>] (0.184 g, 0.759 mmol, 76% yield) as a colorless powder. <sup>1</sup>H NMR (400 MHz, bromobenzene-*d*<sub>5</sub>): δ 5.00-2.90 (br, sext, <sup>1</sup>J<sub>AlH</sub> = 172 Hz, 2 H, AlH<sub>2</sub>), 3.13-3.06 (m, 2 H, CH<sub>2</sub>), 2.88-2.83 (m, 2 H, CH<sub>2</sub>), 2.77-2.72 (m, 2 H, CH<sub>2</sub>), 2.65-2.59 (m, 2 H, CH<sub>2</sub>), 2.57-2.52 (m, 2 H, CH<sub>2</sub>), 2.50-2.47 (m, 4 H, CH<sub>2</sub>), 2.38-2.28 (m, 2 H, CH<sub>2</sub>), 2.31 (s, 3 H, CH<sub>3</sub>), 2.11 (s, 6 H, CH<sub>3</sub>). <sup>13</sup>C{<sup>1</sup>H} NMR (100 MHz, bromobenzene-*d*<sub>5</sub>): δ 59.5, 55.5, 53.0, 44.9, 43.6, 41.6. <sup>27</sup>Al NMR (104 MHz, bromobenzene-*d*<sub>5</sub>): δ 100.4 (quint, <sup>1</sup>J<sub>AlH</sub> = 172 Hz). IR (KBr, cm<sup>-1</sup>): 1804 (s, ν<sub>AlH</sub>), 1664 (s, br, ν<sub>AlH</sub>). Anal. Calcd. for C<sub>11</sub>H<sub>27</sub>N<sub>4</sub>Al: C, 52.52; H, 11.23; N, 23.12. Found: C, 52.02; H, 11.16; N, 22.80. [(L)AlD<sub>2</sub>] (**1-d**<sub>2</sub>) was synthesized in an analogous fashion using AlD<sub>3</sub>(NMe<sub>2</sub>Et). <sup>27</sup>Al NMR (104 MHz, bromobenzene-*d*<sub>5</sub>): δ 100.0 (s). IR (KBr, cm<sup>-1</sup>): 1301 (s, ν<sub>AlD</sub>), 1218 (s, ν<sub>AlD</sub>).

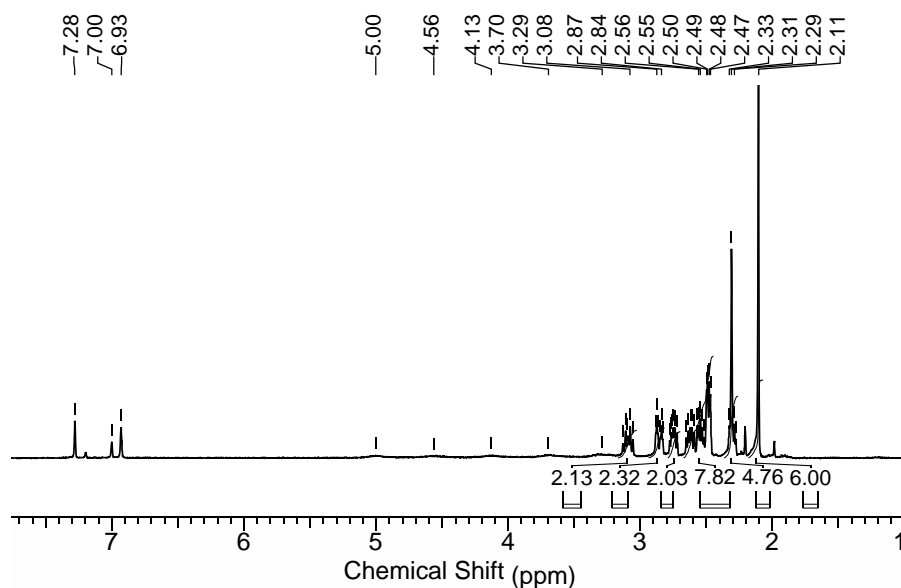

Figure S1. <sup>1</sup>H NMR spectrum of [(L)AlH<sub>2</sub>] (**1**) in bromobenzene-*d*<sub>5</sub>.

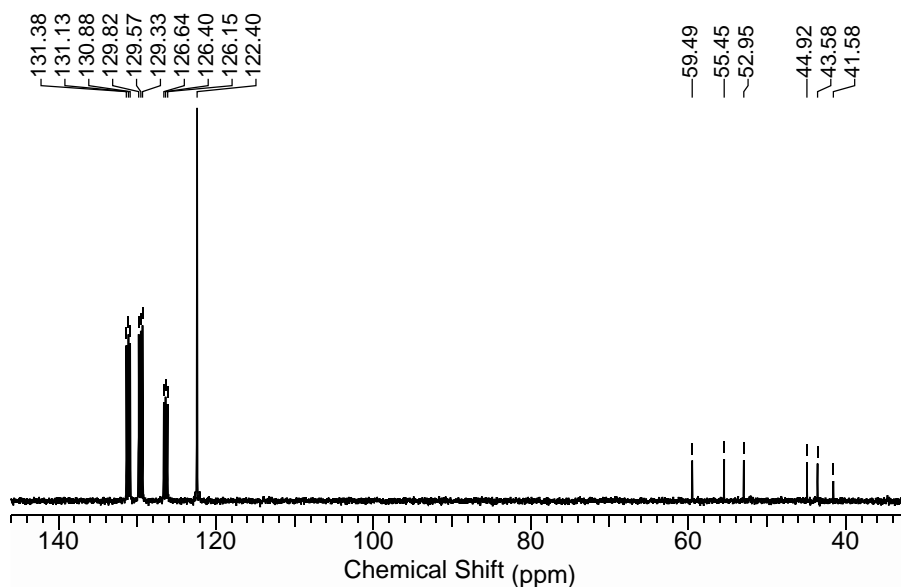

Figure S2. <sup>13</sup>C{<sup>1</sup>H} NMR spectrum of [(L)AlH<sub>2</sub>] (**1**) in bromobenzene-*d*<sub>5</sub>.

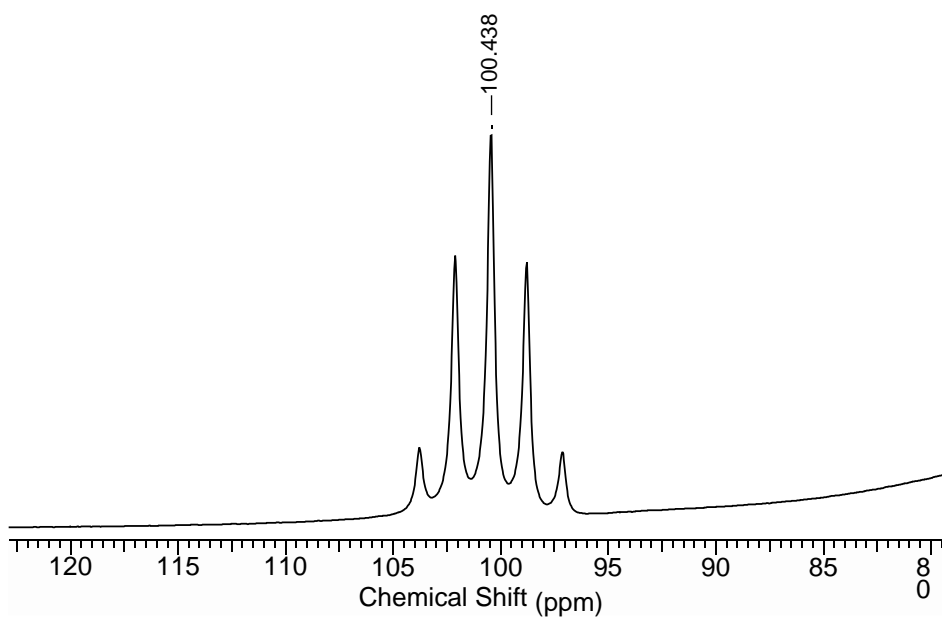

**Figure S3.**  $^{27}\text{Al}$  NMR spectrum of  $[(\text{L})\text{AlH}_2]$  (**1**) in bromobenzene- $d_5$ .

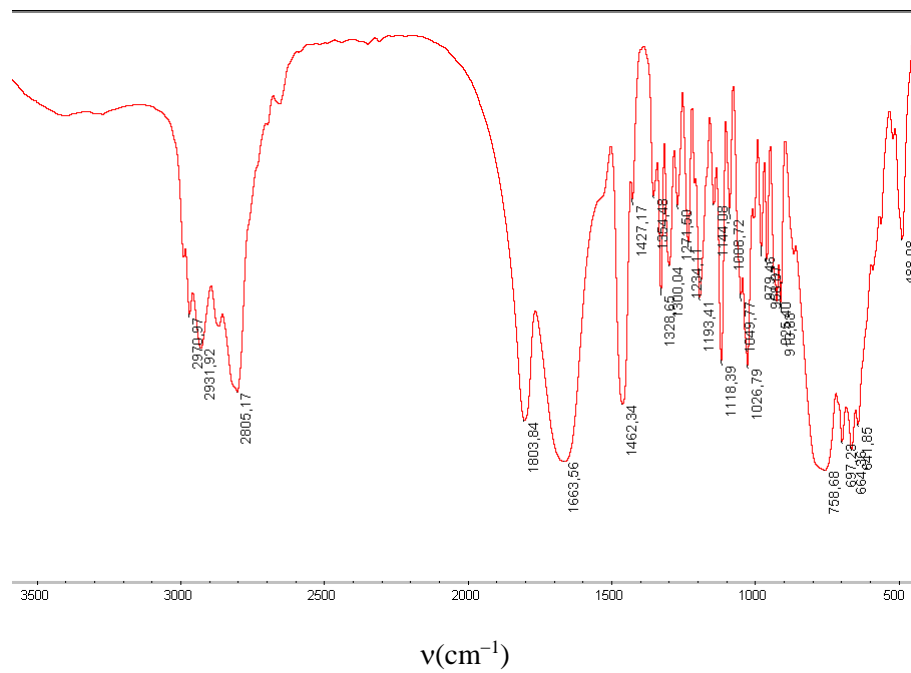

**Figure S4.** Solid-state IR (KBr pellet) spectrum of  $[(\text{L})\text{AlH}_2]$  (**1**).

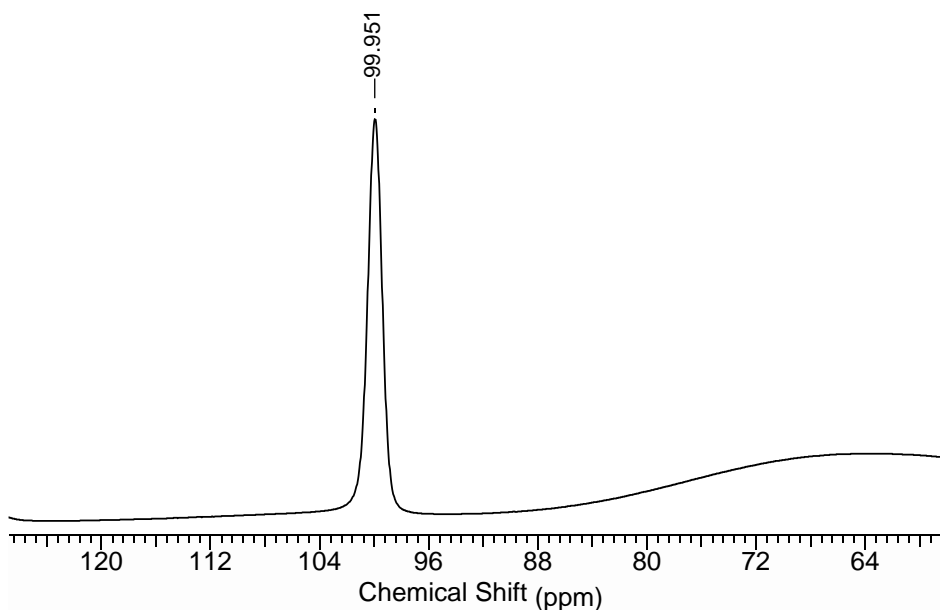

**Figure S5.**  $^{27}\text{Al}$  NMR spectrum of  $[(\text{L})\text{AlD}_2]$  (**1-d<sub>2</sub>**) in bromobenzene- $d_5$ .

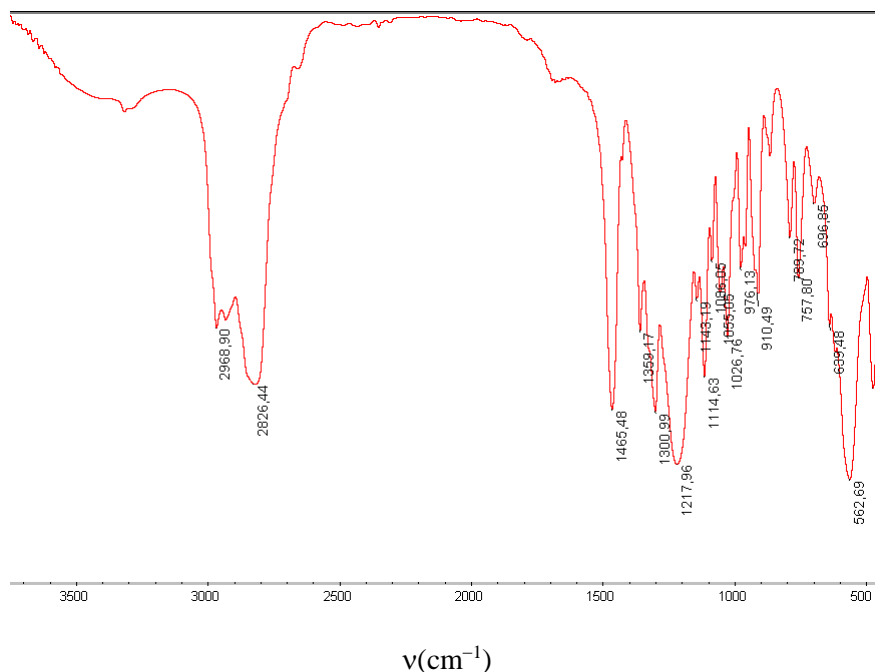

**Figure S6.** Solid-state IR (KBr pellet) spectrum of  $[(\text{L})\text{AlD}_2]$  (**1-d<sub>2</sub>**).

### $[(\text{L})\text{Al}(\text{O}n\text{Bu})][\text{HBPh}_3]$ (**2**)

A solution of **1** (0.050 g, 0.206 mmol) and  $\text{BPh}_3$  (0.100 g, 0.413 mmol) in 3 mL of THF was stirred for 30 min at room temperature. Removing all the volatiles under reduced pressure gave a colorless solid, which was recrystallized by slow diffusion of *n*-pentane into a concentrated THF solution at  $-30^\circ\text{C}$ . Repeating the purification procedure three times followed by drying the solid under vacuum gave analytically pure  $[(\text{L})\text{Al}(\text{O}n\text{Bu})][\text{HBPh}_3]$  (**2**, 0.033 g, 0.117 mmol, 28% yield) as a colorless powder. Single crystals for X-ray diffraction were grown from THF/*n*-pentane.  $^1\text{H}$  NMR (400 MHz, THF- $d_8$ ):  $\delta$  7.38 (m, 6 H, *o*-aryl), 7.01 (m, 6 H, *m*-aryl), 6.90 (m, 3 H, *p*-aryl), 3.74 (t, 2 H,  $^3J_{\text{HH}} = 6.5$  Hz,  $\text{CH}_2$ ), 3.48 (br, s, 1 H,

HB), 2.96-2.90 (m, 2 H, CH<sub>2</sub>), 2.81-2.44 (m, 12 H, CH<sub>2</sub>), 2.43 (s, 6 H, CH<sub>3</sub>), 2.32 (s, 3H, CH<sub>3</sub>), 1.49-1.42 (m, 2 H, CH<sub>2</sub>), 1.39-1.26 (m., 2 H, CH<sub>2</sub>), 0.90 (t, 3 H, <sup>3</sup>J<sub>HH</sub> = 7.3 Hz, CH<sub>3</sub>). <sup>13</sup>C{<sup>1</sup>H} NMR (THF-*d*<sub>8</sub>, 100 MHz): δ 137.2, 126.9, 124.5, 64.0, 60.8, 55.5, 52.5, 45.7, 45.4, 43.3, 38.4, 20.2, 14.6. <sup>11</sup>B NMR (128 MHz, THF-*d*<sub>8</sub>): δ -7.9 (d, <sup>1</sup>J<sub>BH</sub> = 78 Hz). <sup>27</sup>Al NMR (104 MHz, THF-*d*<sub>8</sub>): no resonance was observed. IR (KBr, cm<sup>-1</sup>): 2019-2008 (multiple bands, ν<sub>BH</sub>). Anal. Calcd. for C<sub>33</sub>H<sub>50</sub>BN<sub>4</sub>OAl: C, 71.21; H, 9.06; N, 10.07. Found: C, 70.88; H, 9.66; N, 10.40.

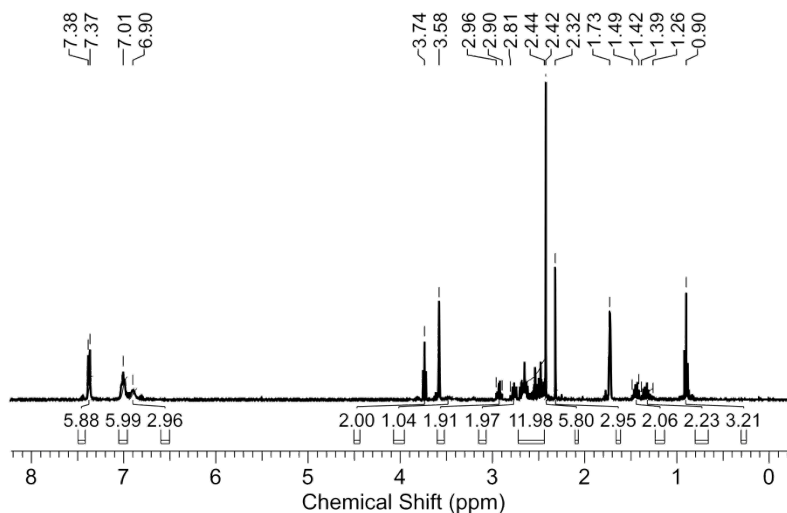

**Figure S7.** <sup>1</sup>H NMR spectrum of [(L)Al(OnBu)][HBPh<sub>3</sub>] (**2**) in THF-*d*<sub>8</sub>.

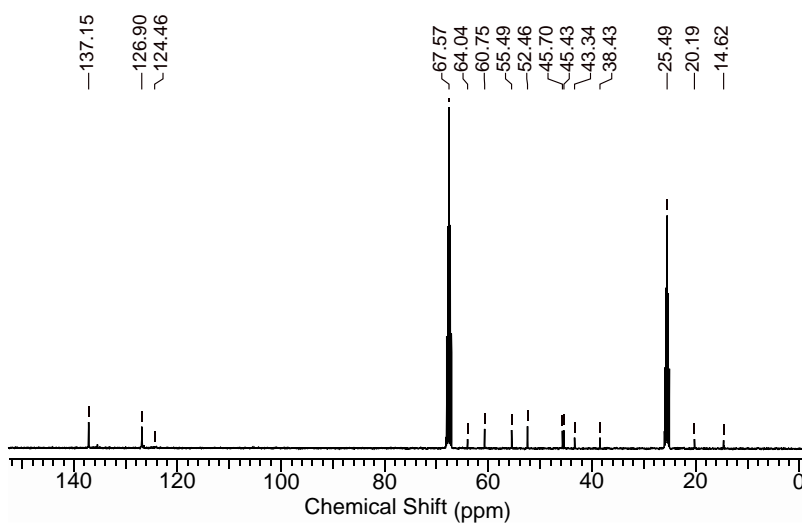

**Figure S8.** <sup>13</sup>C{<sup>1</sup>H} NMR spectrum of [(L)Al(OnBu)][HBPh<sub>3</sub>] (**2**) in THF-*d*<sub>8</sub>.

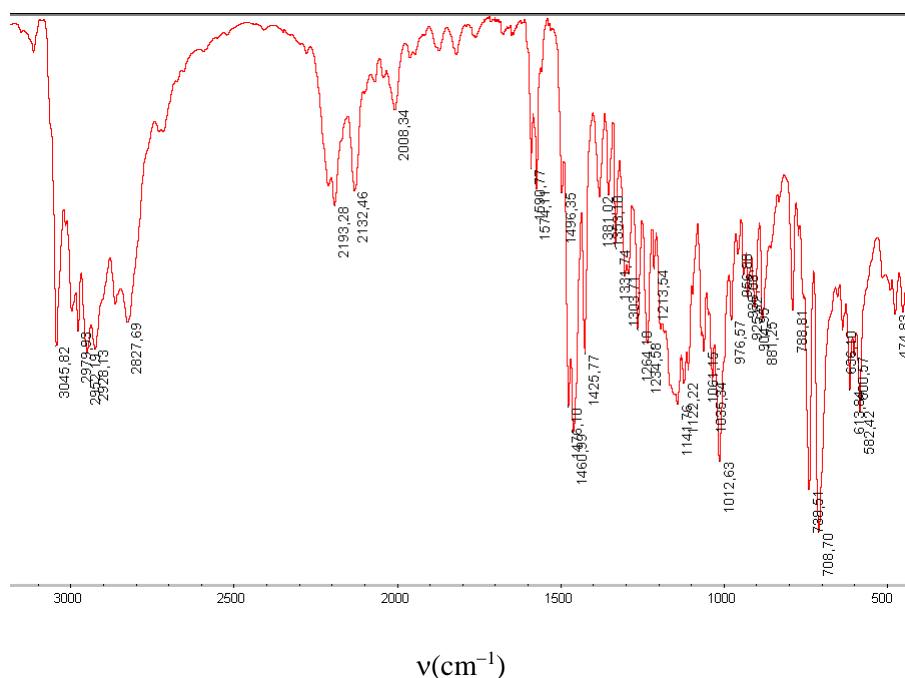

**Figure S9.** Solid-state IR spectrum (KBr pellet) of [(L)Al(OnBu)][HBPh<sub>3</sub>] (**2**).

### [(L)Al(OnPent)][HBPh<sub>3</sub>] (**3**)

A solution of **1** (0.050 g, 0.206 mmol) and BPh<sub>3</sub> (0.100 g, 0.413 mmol) in 3 mL of THP was stirred for 12 h at room temperature. Removing all the volatiles under reduced pressure gave a white sticky residue, which was purified by slow precipitation by diffusion of *n*-pentane into a concentrated THF solution at −30 °C. Repeating the purification procedure three times followed by drying under vacuum gave [(L)Al(OnPent)][HBPh<sub>3</sub>] (**3**, 0.047 g, 0.082 mmol, 40% yield) as a sticky colorless solid. <sup>1</sup>H NMR (400 MHz, THF-*d*<sub>8</sub>): δ 7.38 (m, 6 H, *o*-aryl), 6.97 (m, 6 H, *m*-aryl), 6.80 (m, 3 H, *p*-aryl), 3.69 (m, 2 H, CH<sub>2</sub>), 3.48 (br s, 1 H, HB), 2.89–2.83 (m, 2 H, CH<sub>2</sub>), 2.64–2.42 (m, 10 H, CH<sub>2</sub>), 2.38–2.32 (m, 2 H, CH<sub>2</sub>), 2.29 (s, 6 H, CH<sub>3</sub>), 2.29–2.23 (m, 2 H, CH<sub>2</sub>), 2.16 (s, 3 H, CH<sub>3</sub>), 1.48–1.26 (m, 6 H, CH<sub>2</sub>), 0.91 (m, 3 H, CH<sub>3</sub>). <sup>13</sup>C{<sup>1</sup>H} NMR (THF-*d*<sub>8</sub>, 100 MHz): δ 164.5, 136.8, 126.7, 122.9, 64.3, 60.6, 55.4, 52.2, 45.6, 45.4, 43.3, 38.4, 29.3, 20.2, 14.7. <sup>11</sup>B NMR (128 MHz, THF-*d*<sub>8</sub>): δ −7.9 (d, <sup>1</sup>J<sub>BH</sub> = 78 Hz). <sup>27</sup>Al NMR (104 MHz, THF-*d*<sub>8</sub>): no resonance was observed. IR (KBr, cm<sup>−1</sup>): 2203 (br, ν<sub>BH</sub>). Anal. Calcd. for C<sub>34</sub>H<sub>52</sub>BN<sub>4</sub>OAl: C, 71.57; H, 9.19; N, 9.82. Found: C, 70.90; H, 9.47; N, 9.39.

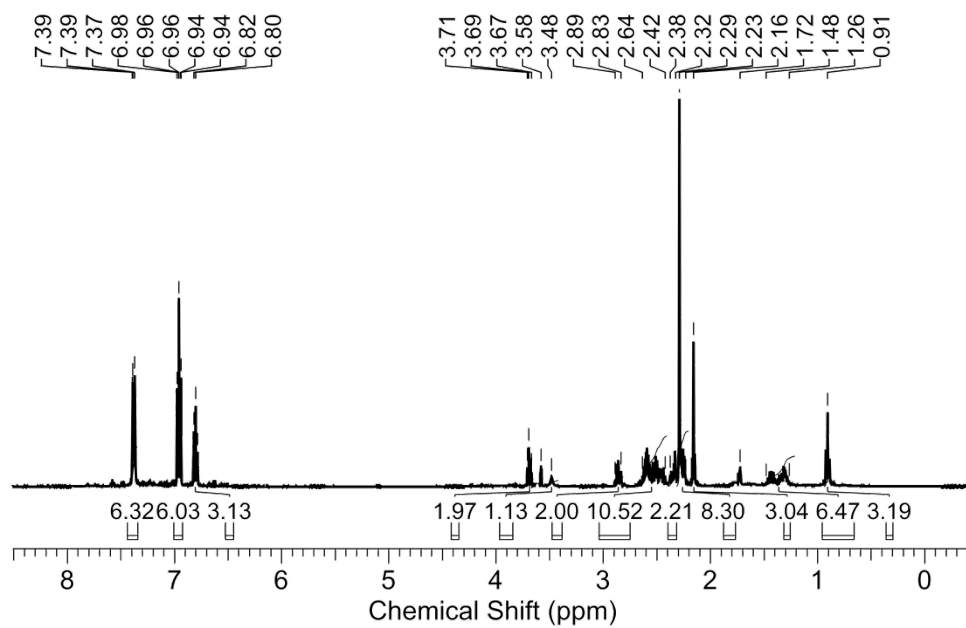

**Figure S10.**  $^1\text{H}$  NMR spectrum of  $[(\text{L})\text{Al}(\text{OnPent})][\text{HBPh}_3]$  (**3**) in  $\text{THF-}d_8$ .

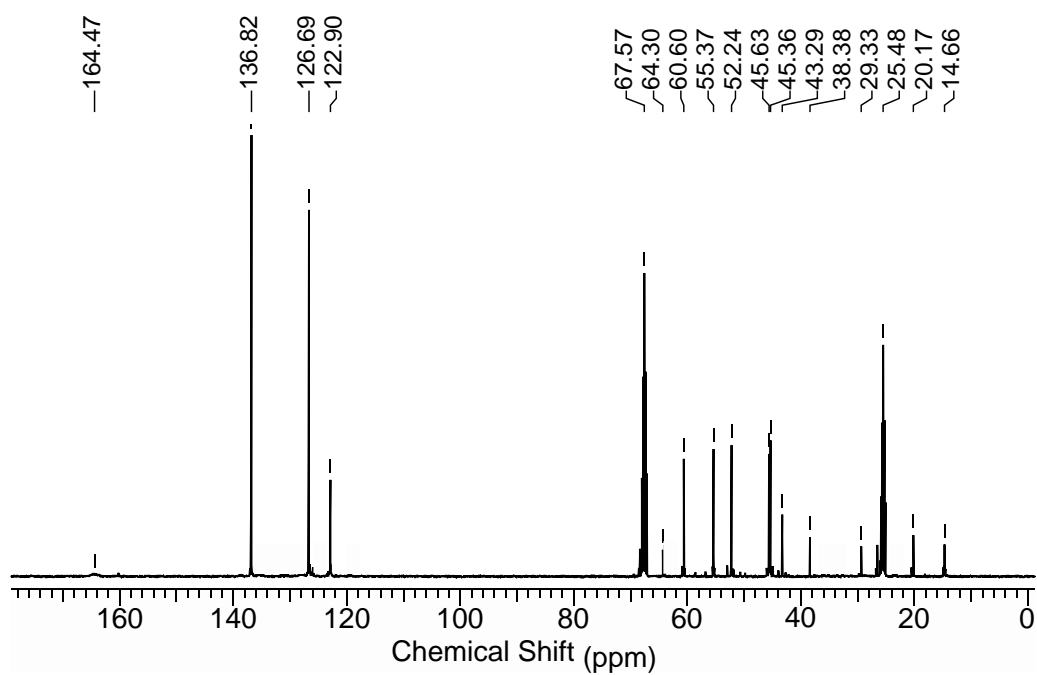

**Figure S11.**  $^{13}\text{C}\{^1\text{H}\}$  NMR spectrum of  $[(\text{L})\text{Al}(\text{OnPent})][\text{HBPh}_3]$  (**3**) in  $\text{THF-}d_8$ .

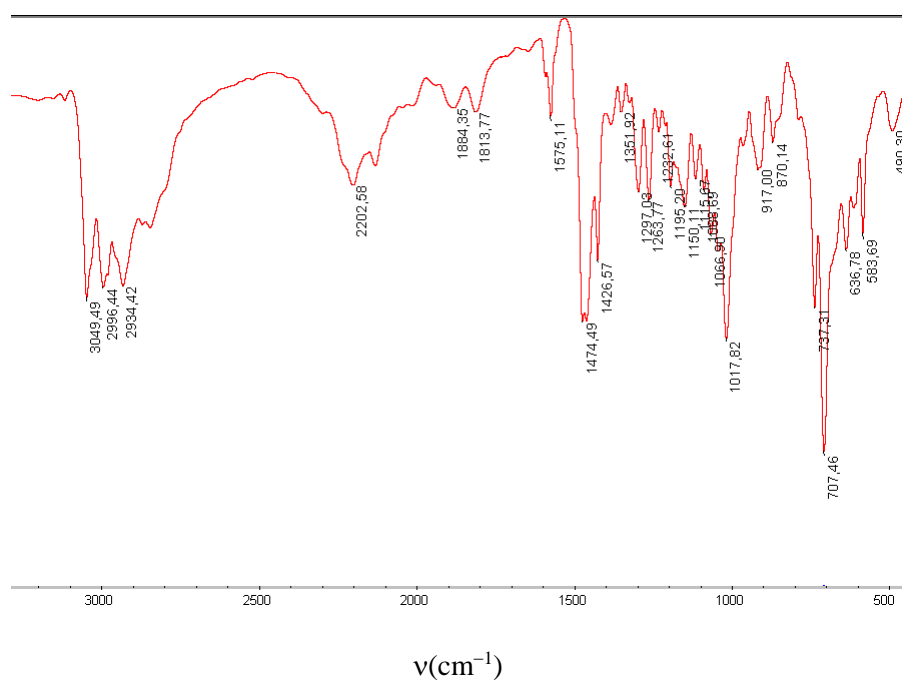

**Figure S12.** Solid-state IR spectrum (KBr pellet) of [(L)Al(OnPent)][HBPh<sub>3</sub>] (**3**).

#### [(L)AlH][HBPh<sub>3</sub>] (**4**)

A suspension of [(L)Al(H)<sub>2</sub>]<sub>2</sub> (**1**, 0.050 g, 0.206 mmol) and BPh<sub>3</sub> (0.050 g, 0.206 mmol) in 5 mL of benzene was stirred at room temperature for 30 min. A colorless solid was isolated by filtration and washed with *n*-pentane (3×5mL). Drying the solid under vacuum afforded analytical pure [(L)AlH][HBPh<sub>3</sub>] (**4**, 0.065 g, 0.117 mmol, 57% yield) as a colorless powder. <sup>1</sup>H NMR (400 MHz, THF-*d*<sub>8</sub>): δ 7.31 (m, 6 H, *o*-aryl), 6.89 (m, 6 H, *m*-aryl), 6.72 (m, 3 H, *p*-aryl), 3.78-3.18 (br, q, 1 H, *HB*),\* 3.00-2.94 (m, 2 H, CH<sub>2</sub>), 2.81-2.72 (m, 4 H, CH<sub>2</sub>), 2.70-2.48 (m, 10 H, CH<sub>2</sub>), 2.34 (s, 6 H, CH<sub>3</sub>), 2.26 (s, 3H, CH<sub>3</sub>). <sup>13</sup>C{<sup>1</sup>H} NMR (100 MHz, THF-*d*<sub>8</sub>): δ 165.9, 136.7, 129.2, 122.1, 60.3, 56.2, 53.7, 46.0, 44.1, 41.5, 25.5. <sup>11</sup>B NMR (128 MHz, THF-*d*<sub>8</sub>): δ -7.9 (d, <sup>1</sup>J<sub>BH</sub> = 78 Hz). <sup>27</sup>Al NMR (104 MHz, THF-*d*<sub>8</sub>): δ 101.9 (br). IR (KBr, cm<sup>-1</sup>): 2196-2134 (ν<sub>BH</sub>), 1803 (ν<sub>AlH</sub>). Anal. Calcd. for C<sub>29</sub>H<sub>42</sub>BN<sub>4</sub>Al: C, 71.90; H, 8.74; N, 11.56. Found: C, 71.45; H, 8.49; N, 11.77. \*The AlH resonance is broad and likely overlapping with the BH resonance and could not be assigned unambiguously.



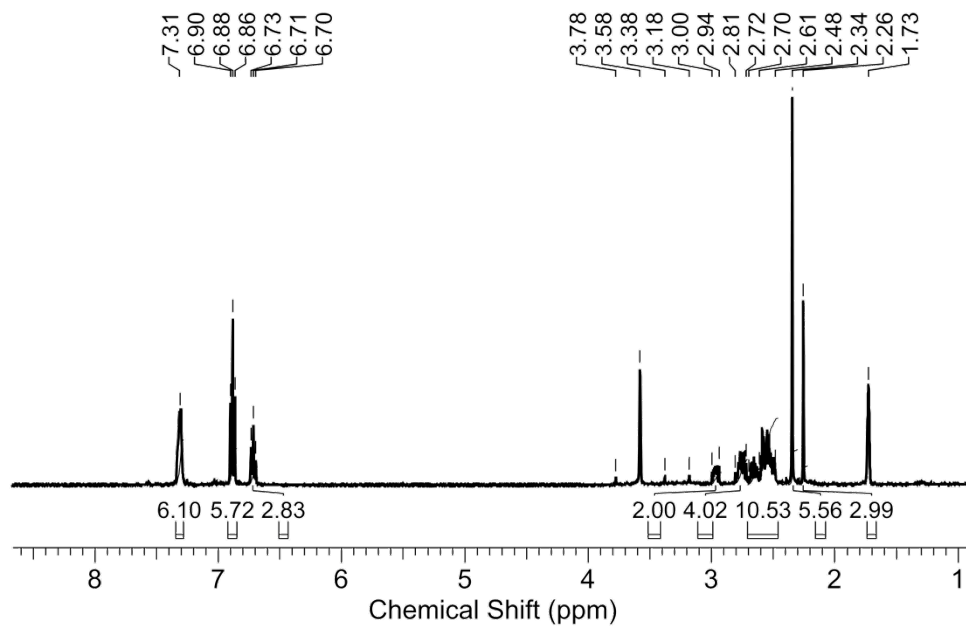

**Figure S13.**  $^1\text{H}$  NMR spectrum of  $[(\text{L})\text{AlH}][\text{HBPh}_3]$  (**4**) in  $\text{THF-}d_8$ .

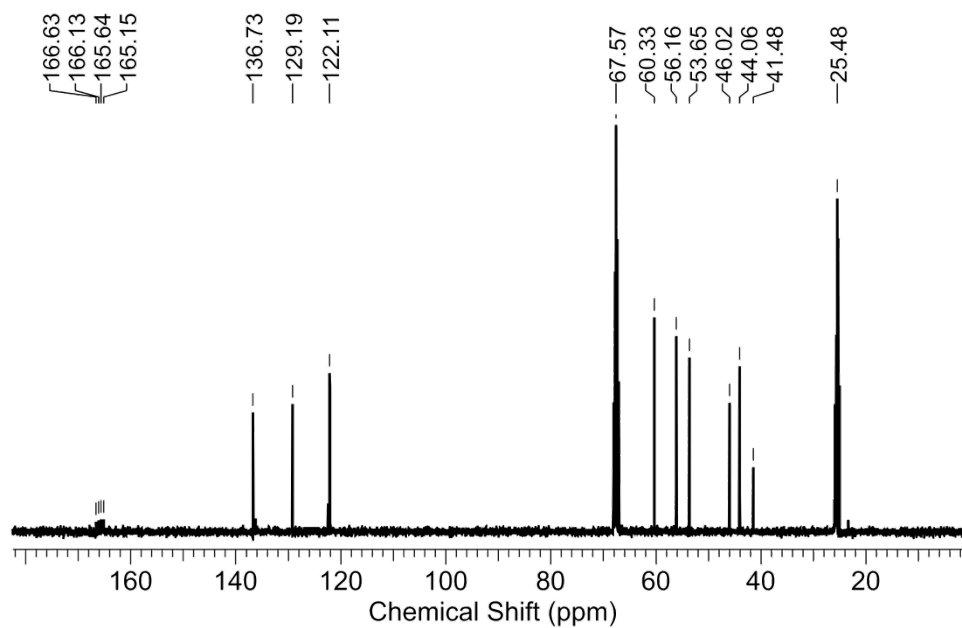

**Figure S14.**  $^{13}\text{C}\{^1\text{H}\}$  NMR spectrum of  $[(\text{L})\text{AlH}][\text{HBPh}_3]$  (**4**) in  $\text{THF-}d_8$ .

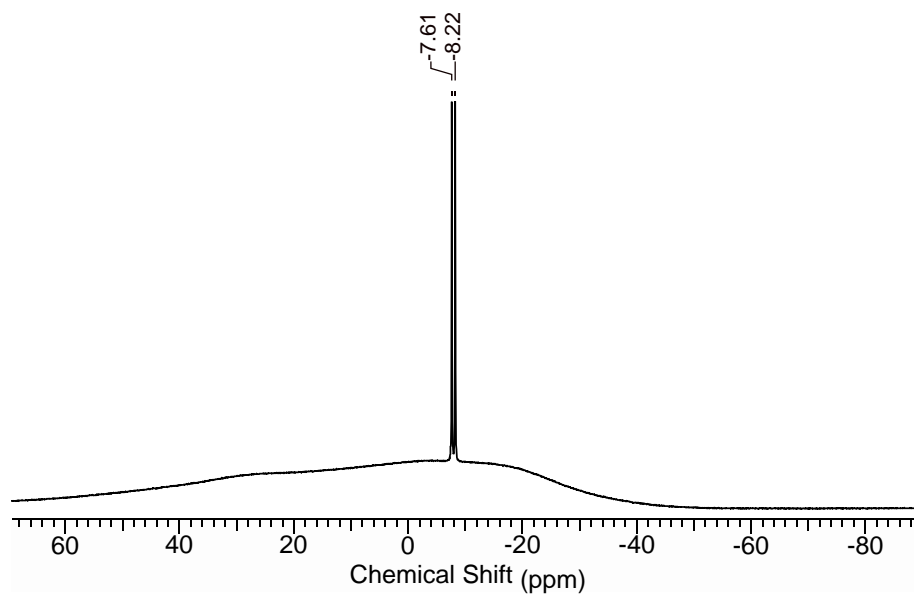

**Figure S15.**  $^{11}\text{B}$  NMR spectrum of  $[(\text{L})\text{AlH}][\text{HBPh}_3]$  (**4**) in  $\text{THF-}d_8$ .

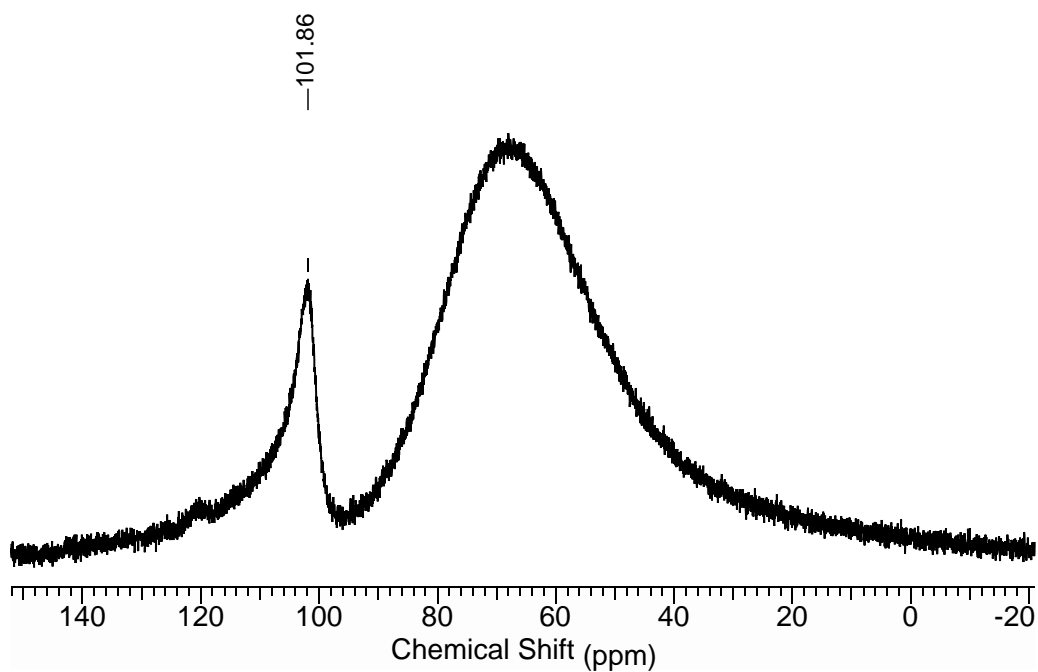

**Figure S16.**  $^{27}\text{Al}$  NMR spectrum of  $[(\text{L})\text{AlH}][\text{HBPh}_3]$  (**4**) in  $\text{THF-}d_8$ .

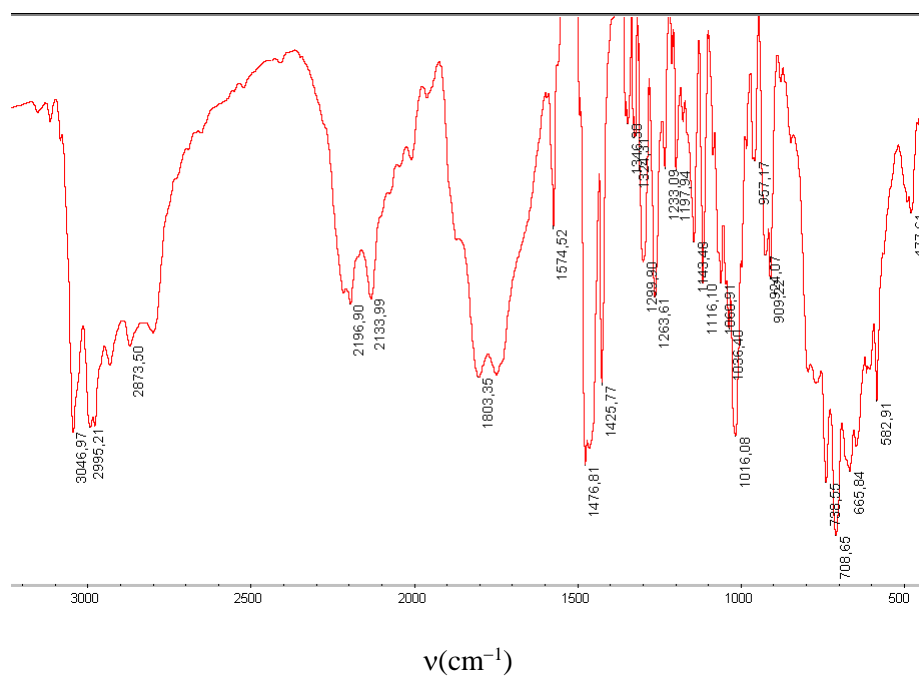

**Figure S17.** Solid-state IR spectrum (KBr pellet) of [(L)AlH][HBPh<sub>3</sub>] (**4**).

### Deuterium labeling study

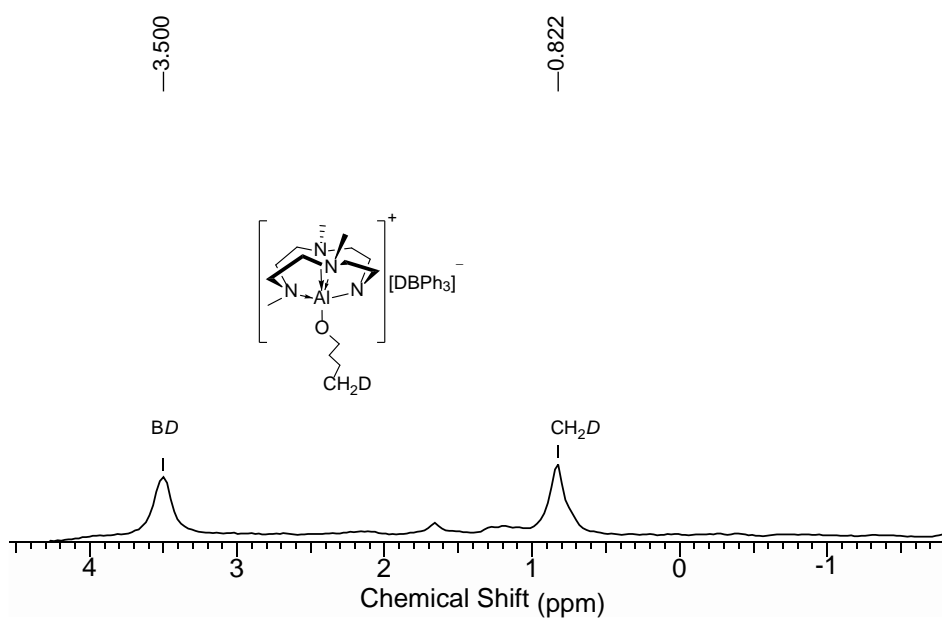

**Figure S18.** <sup>2</sup>D{<sup>1</sup>H} NMR of **2-d<sub>2</sub>** in THF.

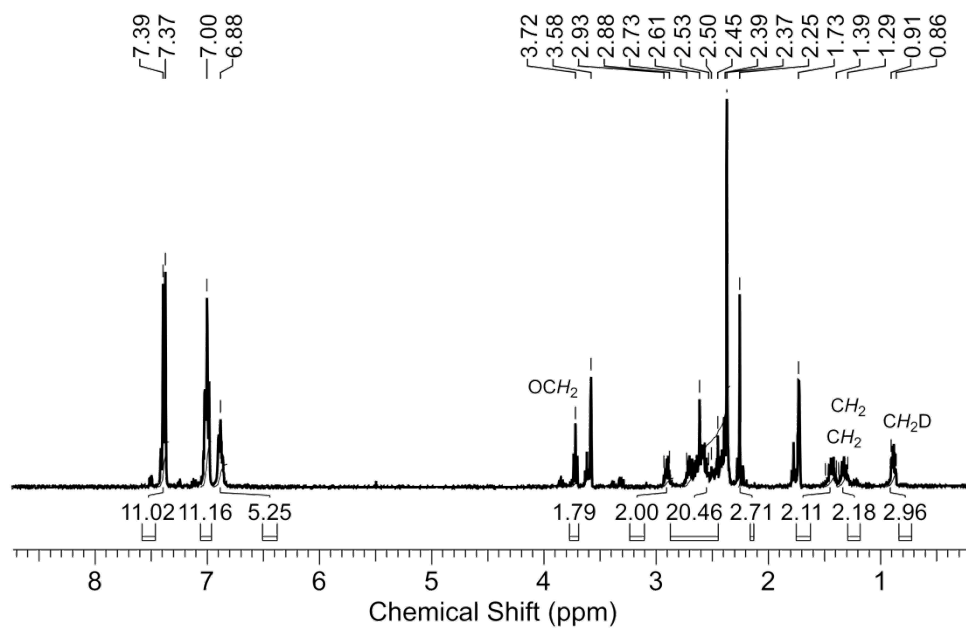

**Figure S19.**  $^1\text{H}$  NMR of **2-d<sub>2</sub>** in  $\text{THF-d}_8$ .

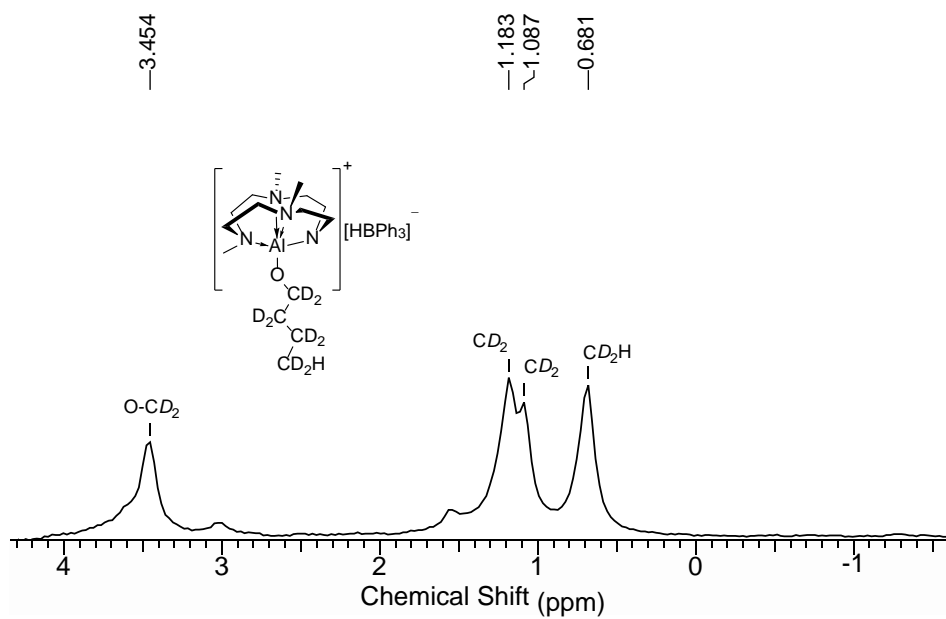

**Figure S20.**  $^2\text{D}\{^1\text{H}\}$  NMR of **2-d<sub>8</sub>** in THF.

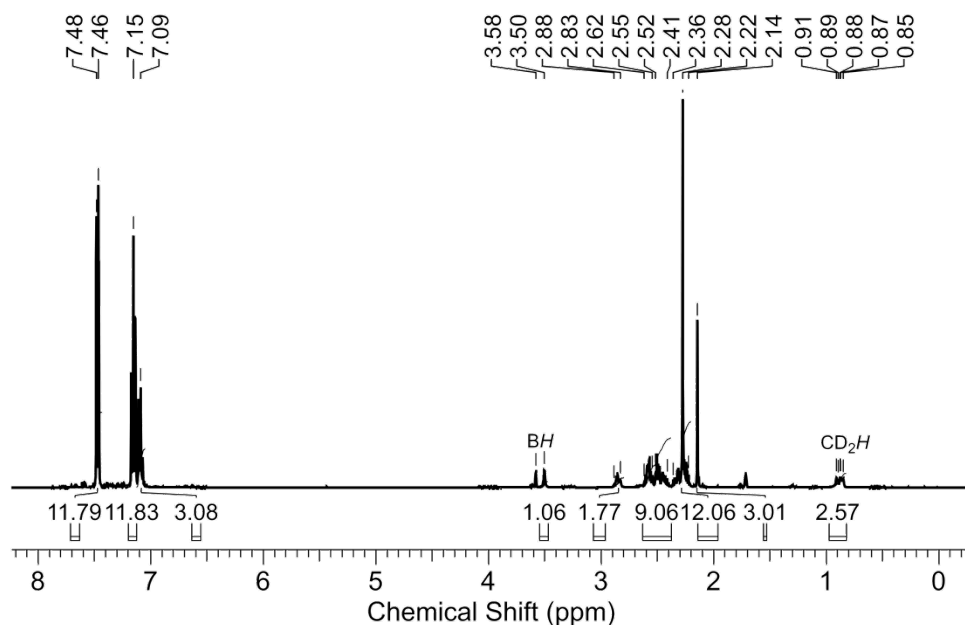

Figure S20.  $^1\text{H}$  NMR of **2-d<sub>8</sub>** in  $\text{THF-d}_8$ .

## Hydroboration catalysis

In a typical run, a 2.5 mL solution of **1** (0.019 mg, 0.078 mmol),  $\text{BPh}_3$  (0.038 mg, 0.157 mmol) and  $\text{HBpin}$  (0.100 mg, 0.781 mmol) in THF or THP was transferred to a 25 mL Schlenk tube. The mixture was stirred at room temperature and aliquots were drawn intermittently to monitor the reaction progress by analyzing by  $^1\text{H}$  and  $^{11}\text{B}$  NMR spectroscopy. The products  $\text{pinB(OR)}$  ( $\text{R} = n\text{Bu}$  and  $n\text{Pent}$ ) were characterized by NMR spectroscopy and confirmed by comparison with literature data.<sup>S3</sup>

## X-ray crystallography

Single-crystal X-ray diffraction measurements of **2** and **4** were performed on a Bruker AXS diffractometer equipped with an Incoatec microsource and an APEX area detector using  $\text{MoK}\alpha$  radiation ( $\lambda = 0.71073 \text{ \AA}$ ), multilayer optics and  $\omega$ -scans. Temperature control was achieved with an Oxford cryostream 700. The SMART program was used for data collection and unit cell determination; processing of the raw data frame was performed using SAINT+,<sup>S4</sup> multi scan absorption corrections were applied with SADABS.<sup>S5</sup> The structures were solved by direct methods (SHELXS-2013).<sup>S6</sup> Refinements were performed against  $F^2$  using all reflections with the program SHELXL-2013.<sup>S6</sup> Hydrogen atoms were included as riding on calculated positions with  $U_{\text{iso}}(\text{H}) = 1.2U_{\text{eq}}$  or  $1.5U_{\text{eq}}$  (non-H), except for the hydride atoms H1 in **2** as well as H1 and H2 in **4**. These atoms were localized in difference Fourier maps and refined in their positions with isotropic displacement parameters. All non-hydrogen atoms were refined anisotropically. The structure of **2** contains one co-crystallized solvent molecule

THF within the lattice. Refinement results are given in Table S1. Graphical representations were performed with the program DIAMOND.<sup>S7</sup> CCDC reference numbers CCDC-1530667 (2) and 1530668 (4). These data can be obtained free of charge from the Crystallographic Data Centre via [www.ccdc.cam.ac.uk/data\\_request/cif](http://www.ccdc.cam.ac.uk/data_request/cif).

**Table S1. Crystal data and structure refinement.**

|                                                      | 2                                                                                        | 4                                                                                   |
|------------------------------------------------------|------------------------------------------------------------------------------------------|-------------------------------------------------------------------------------------|
| chemical formula                                     | C <sub>15</sub> H <sub>34</sub> AlN <sub>4</sub> O,<br>C <sub>18</sub> H <sub>16</sub> B | C <sub>11</sub> H <sub>26</sub> AlN <sub>4</sub> ,C <sub>18</sub> H <sub>16</sub> B |
| fw (g·mol <sup>-1</sup> )                            | 628.66                                                                                   | 484.45                                                                              |
| space group                                          | <i>P</i> $\bar{1}$                                                                       | <i>P</i> $\bar{1}$                                                                  |
| crystal size (mm)                                    | 0.12 × 0.14 × 0.19                                                                       | 0.20 × 0.25 × 0.29                                                                  |
| unit cell parameters                                 |                                                                                          |                                                                                     |
| <i>a</i> (Å)                                         | 10.748(8)                                                                                | 9.8159(18)                                                                          |
| <i>b</i> (Å)                                         | 11.615(9)                                                                                | 10.726(2)                                                                           |
| <i>c</i> (Å)                                         | 15.531(12)                                                                               | 13.269(2)                                                                           |
| $\alpha$ (°)                                         | 103.493(11)                                                                              | 87.579(4)                                                                           |
| $\beta$ (°)                                          | 107.633(10)                                                                              | 75.801(3)                                                                           |
| $\gamma$ (°)                                         | 97.170(9)                                                                                | 83.365(3)                                                                           |
| <i>V</i> (Å <sup>3</sup> )                           | 1756(2)                                                                                  | 1345.2(4)                                                                           |
| <i>Z</i>                                             | 2                                                                                        | 2                                                                                   |
| <i>T</i> (K)                                         | 100(2)                                                                                   | 100(2)                                                                              |
| $\mu$ (Mo K $\alpha$ ) (mm <sup>-1</sup> )           | 0.096                                                                                    | 0.100                                                                               |
| reflns                                               | 11357                                                                                    | 16590                                                                               |
| independent reflns ( <i>R</i> <sub>int.</sub> )      | 6333 (0.1492)                                                                            | 5563 (0.0886)                                                                       |
| observed reflns                                      | 3782                                                                                     | 4247                                                                                |
| parameters                                           | 414                                                                                      | 325                                                                                 |
| goodness of fit on <i>F</i> <sup>2</sup>             | 1.025                                                                                    | 1.035                                                                               |
| final R indices                                      |                                                                                          |                                                                                     |
| <i>R</i> 1, <i>wR</i> 2 [ <i>I</i> ≥ 2σ( <i>I</i> )] | 0.0778, 0.1795                                                                           | 0.0592, 0.1361                                                                      |
| <i>R</i> 1, <i>wR</i> 2 (all data)                   | 0.1335, 0.2089                                                                           | 0.0793, 0.1454                                                                      |

## References

- S1 M. Ohashi, M. Konkol, I. Del Rosal, R. Poteau, L. Maron and J. Okuda, *J. Am. Chem. Soc.* 2008, **130**, 6920–6921.
- S2 G. R. Fulmer, A. J. M. Miller, N. H. Sherden, H. E. Gottlieb, A. Nudelman, B. M. Stoltz, J. E. Bercaw and K. I. Goldberg, *Organometallics* 2010, **29**, 2176–2179.
- S3 E. A. Romero, J. L. Peltier, R. Jazzar and G. Bertrand, *Chem. Commun.* 2016, **52**, 10563–10565.
- S4 Bruker, SAINT-Plus, Bruker AXS Inc., Madison, Wisconsin, USA, 1999.
- S5 Bruker, SADABS, Bruker AXS Inc. Madison, Wisconsin, USA, 2004.
- S6 G. M. Sheldrick, *Acta Crystallogr. Sect. A* 2008, **64**, 112–122.
- S7 K. Brandenburg, DIAMOND, Crystal Impact GbR, Bonn, Germany, 2017.
